# Supplementary material
Source: HighWire-hosted journal article supplement (https://jnm.snmjournals.org/highwire/filestream/94937/field_highwire_adjunct_files/0/167734_Supplemental_Data.pdf)
Supplement: 167734_Supplemental_Data.pdf [file 167734_Supplemental_Data.pdf]

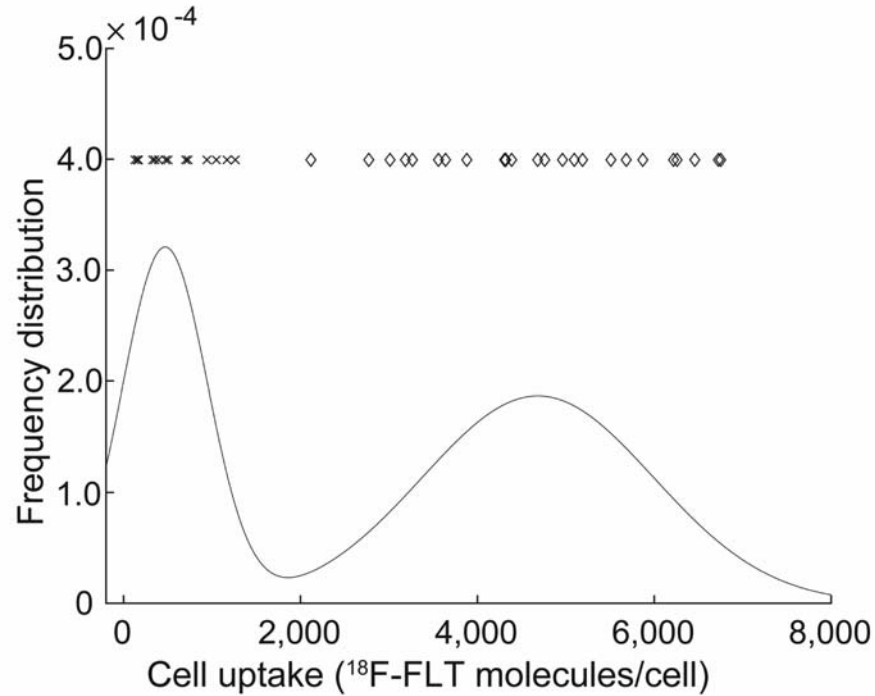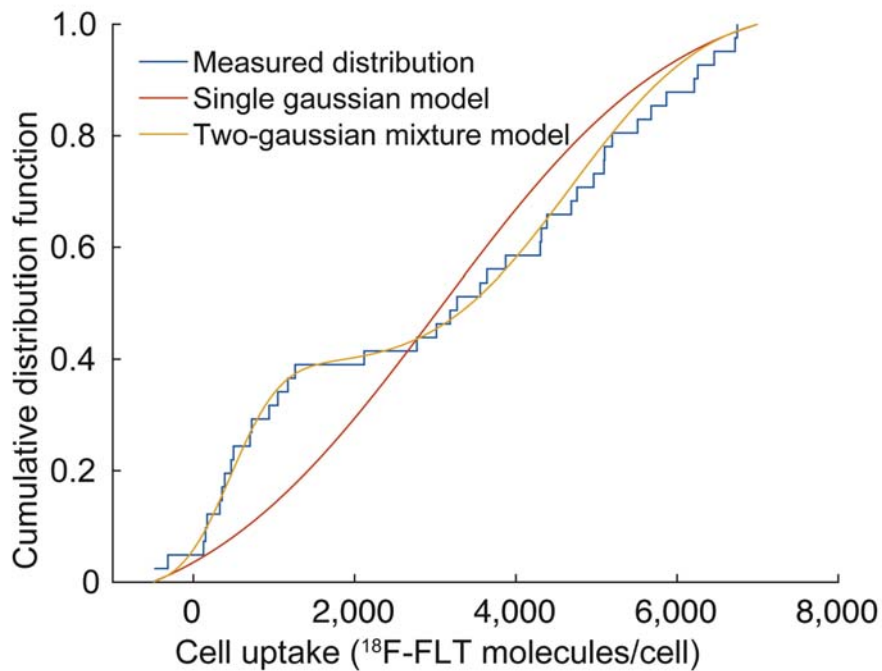

**Supplemental Figure 1:** (A) Automated clustering applied to single-cell  $^{18}\text{F}$ -FLT measurements (20% serum), using a gaussian mixture model with 2 clusters. The symbols  $\times$  and  $\diamond$  represent single cells in the  $^{18}\text{F}$ -FLT–low and  $^{18}\text{F}$ -FLT–high clusters, as determined by clustering. (B) Cumulative distribution function (CDF) for the experimentally measured  $^{18}\text{F}$ -FLT uptake (*blue*), and maximum-likelihood curve fitting using 1-gaussian model (*red*) and 2-gaussian mixture model (*orange*).

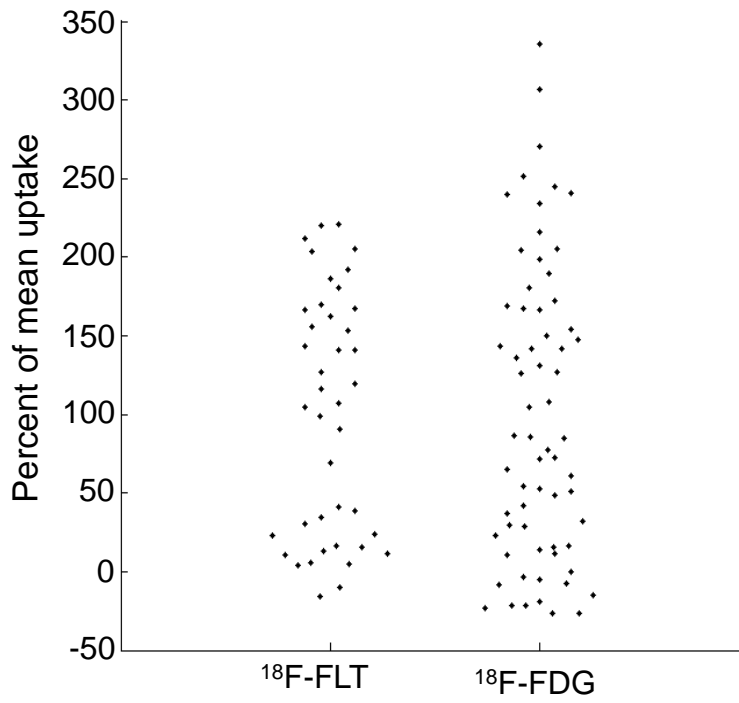

**Supplemental Figure 2:** Typical single-cell distribution of  $^{18}\text{F}$ -FLT and  $^{18}\text{F}$ -FDG, normalized to average population uptake.
